# Supplementary material
Source: HighWire-hosted journal article supplement (https://www.jneurosci.org/content/41/29/6202)
Supplement: inline-supplementary-material-2 [file inline-supplementary-material-2.docx]

**Extended Data Figure 1-1. Statistical Results**

| **Natural Mating: F1 Male** | | | | | | | | | | |
| --- | --- | --- | --- | --- | --- | --- | --- | --- | --- | --- |
| **Experiment** | **Condition** | **Measurement** | **Statistical Test** | **Comparison** | **F (DFn, DFd)** | **P value** | ***** | **Group Size** | **Notes** | **Figure** |
| **Novelty Suppressed Feeding** | baseline and stressed | ratio latency to eat | 2-way ANOVA | Interaction | F (2, 54) = 2.070 | 0.1361 | ns | CC=11; CS=12 RC=8; RS=8 SC=12; SS=11 | data normally distributed; 2 outlier CC and SC | **Figure 1d** |
| Treatment (Stress) | F (1, 54) = 16.32 | 0.0002 | *** |
| Paternal Category | F (2, 54) = 1.911 | 0.1578 | ns |
| Bonferronis multiple comparison Test | CC vs CR | t=1.134 df=54.00 | 0.5236 | ns |
| CC vs CS | t=0.6136 df=54.00 | >0.9999 | ns |
| SC vs SR | t=0.1321 df=54.00 | >0.9999 | ns |
| SC vs SS | t=2.271 df=54.00 | 0.0543 | # |
| CC vs SC | t=1.193 df=54.00 | 0.7143 | ns |
| CR vs SR | t=1.905 df=54.00 | 0.1863 | ns |
| CS vs SS | t=4.004 df=54.00 | 0.0006 | *** |
| **Open Field** | baseline and stressed | % time middle | 2-way ANOVA | Interaction | F (2, 55) = 1.230 | 0.3001 | ns | CC=12; CS=12 RC=8; RS=7 SC= 11; SS=11 | data normally distributed, transformed (sqrt); 2 outliers RS SC | **Figure 1e** |
| Treatment (Stress) | F (1, 55) = 13.23 | 0.0006 | *** |
| Paternal Category | F (2, 55) = 0.2576 | 0.7738 | ns |
| Bonferronis multiple comparison Test | CC vs CS | t=2.597 df=55.00 | 0.0361 | * |
| RC vs RS | t=2.700 df=55.00 | 0.0276 | * |
| SC vs SS | t=0.9344 df=55.00 | >0.9999 | ns |
| CC vs RC | t=0.8092 df=55.00 | 0.8438 | ns |
| CC vs SC | t=0.3656 df=55.00 | >0.9999 | ns |
| CS vs RS | t=0.06768 df=55.00 | >0.9999 | ns |
| CS vs SS | t=1.220 df=55.00 | 0.4555 | ns |
| baseline and stressed | total distance | 2-way ANOVA | Interaction | F (2, 57) = 0.03825 | 0.9625 | ns | CC=12; CS=12 RC=8; RS=8 SC=12; SS= 11 | data normally distributed; no outliers | **data not shown, instead reporting mean(SEM)** baseline=C: 3809.03(367.71), R: 3987.11(319.42), S: 4134.22(311.82); stress= C: 4324.05(299.57), R: 4676.73(416.73) S: 4795.22(334.49) |
| Treatment (Stress) | F (1, 57) = 4.778 | 0.033 | * |
| Paternal Category | F (2, 57) = 0.7786 | 0.4639 | ns |
| Bonferronis multiple comparison Test | CC vs CS | t=1.136 df=57.00 | 0.782 | ns |
| RC vs RS | t=1.242 df=57.00 | 0.6578 | ns |
| SC vs SS | t=1.426 df=57.00 | 0.4778 | ns |
| CC vs RC | t=0.3514 df=57.00 | >0.9999 | ns |
| CC vs SC | t=0.7174 df=57.00 | 0.9522 | ns |
| CS vs RS | t=0.6959 df=57.00 | 0.9786 | ns |
| CS vs SS | t=1.017 df=57.00 | 0.6273 | ns |
| **Social Interaction Test (SCVS stressor)** | baseline and stressed | SI ratio | 2-way ANOVA | Interaction | F (2, 57) = 0.3440 | 0.7104 | ns | CC=14; CS=12; RC=8; RS=8; SC=12; SS=9; | data normally distributed; no outliers | **data not shown, instead reporting mean(SEM);** baseliine=C: 1.06(0.21), R: 1.04(0.37), S: 0.88(0.16); stress= C: 1.10(0.22), R: 0.95(0.25) S: 1.18(0.19) |
| Treatment (Stress) | F (1, 57) = 0.1950 | 0.6605 | ns |
| Paternal Category | F (2, 57) = 0.07968 | 0.9235 | ns |
| Bonferronis multiple comparison Test | CC vs CR | t=0.07555 df=57.00 | >0.9999 | ns |
| CC vs CS | t=0.6466 df=57.00 | >0.9999 | ns |
| SC vs SR | t=0.4593 df=57.00 | >0.9999 | ns |
| SC vs SS | t=0.2252 df=57.00 | >0.9999 | ns |
| CC vs SC | t=0.1392 df=57.00 | >0.9999 | ns |
| CR vs SR | t=0.2428 df=57.00 | >0.9999 | ns |
| CS vs SS | t=0.9263 df=57.00 | >0.9999 | ns |
| **Social Interaction Test (CSDS stressor)** | pre defeat vs post defeat | SI ratio | 2-way ANOVA | Interaction | F (2, 24) = 0.4559 | 0.6392 | ns | CC=6; CS=6; RC=4; RS=4; SC=6; SS=4 | data normally distributed; no outliers | **Figure 1g** |
| Treatment (Stress) | F (1, 24) = 19.75 | 0.0002 | *** |
| Paternal Category | F (2, 24) = 0.3855 | 0.6842 | ns |
| Bonferronis multiple comparison Test | CC vs CR | t=0.4748 df=24.00 | >0.9999 | ns |
| CC vs CS | t=0.9246 df=24.00 | 0.7288 | ns |
| SC vs SR | t=0.2012 df=24.00 | >0.9999 | ns |
| SC vs SS | t=0.2012 df=24.00 | >0.9999 | ns |
| CC vs SC | t=3.15 df=24.00 | 0.013 | * |
| CR vs SR | t=2.822 df=24.00 | 0.0283 | * |
| CS vs SS | t=1.789 df=24.00 | 0.2585 | ns |

Environment=Home vs Novel
Data Normal=Kolmogorov-Smirnov : p>0.05
SEM=standard error mean; PS=paternal stress; OS=offspring stress; CC=control lineage/control; CS=control lineage/stress; RC=resilient lineage/control; RS=resilient lineage/stress; SC=Suscpetible lineage/control; SS=Suscpetible lineage/stress

**Extended Data Figure 2-1. Statistical Results**

| **Natural Mating: F1 Female** | | | | | | | | | | |
| --- | --- | --- | --- | --- | --- | --- | --- | --- | --- | --- |
| **Experiment** | **Condition** | **Measurement** | **Statistical Test** | **Comparison** | **F (DFn, DFd)** | **P value** | ***** | **Group Size** | **Notes** | **Fig.** |
| **Novelty Suppressed Feeding** | baseline and stressed | NSF ratio | 2 way ANOVA | Interaction | F (2, 44) = 0.9579 | 0.3916 | ns | CC=9; CS=9; RC=7; RS=7; SC=9; SS=9 | data normally distributed; no outliers | **data not shown, instead reporting mean(SEM)** baseline=C: 6.2(1.82), R: 2.50(0.44), S: 3.15(0.39); stress= C: 4.03(0.86), R: 4.58(1.23) S: 4.76(1.54) |
| Treatment (Stress) | F (1, 44) = 0.2866 | 0.5951 | ns |
| Paternal Category | F (2, 44) = 0.5224 | 0.5967 | ns |
| Bonferronis multiple comparison Test | CC vs CS | t=0.6894 df=44.00 | >0.9999 | ns |
| RC vs RS | t=1.237 df=44.00 | 0.6677 | ns |
| SC vs SS | t=0.2570 df=44.00 | >0.9999 | ns |
| CC vs RC | t=1.653 df=44.00 | 0.2111 | ns |
| CC vs SC | t=1.019 df=44.00 | 0.6275 | ns |
| CS vs RS | t=0.3045 df=44.00 | >0.9999 | ns |
| CS vs SS | t=0.07265 df=44.00 | >0.9999 | ns |
| **Open Field** | baseline and stressed | % time middle | 2 way ANOVA | Interaction | F (2, 54) = 1.325 | 0.2744 | ns | CC=10; CS=12 RC=9; RS=7 SC=10; SS=12 | data normally distributed; no outliers | **Figure 2c** |
| Treatment (Stress) | F (1, 54) = 5.323 | 0.0249 | * |
| Paternal Category | F (2, 54) = 0.3965 | 0.6746 | ns |
| Bonferronis multiple comparison Test | CC vs CS | t=0.3147 df=54.00 | >0.9999 | ns |
| RC vs RS | t=1.120 df=54.00 | 0.8026 | ns |
| SC vs SS | t=2.612 df=54.00 | 0.0349 | * |
| CC vs RC | t=0.9774 df=54.00 | 0.6654 | ns |
| CC vs SC | t=0.9942 df=54.00 | 0.6492 | ns |
| CS vs RS | t=0.04047 df=54.00 | >0.9999 | ns |
| CS vs SS | t=1.320 df=54.00 | 0.3848 | ns |
| baseline and stressed | total distance | 2 way ANOVA | Interaction | F (2, 53) = 0.06533 | 0.9368 | ns | CC=10; CS=12 RC=9; RS=7 SC=10; SS=12 | data normally distributed; no outliers | **data not shown, instead reporting mean(SEM)** baseline=C: 4434.95(527.13), R: 3958.67)(320.27), S: 4557.68(396.61); stress= C: 4847.02(468.53), R: 4609.06(436.27) S: 5262.18(407.75) |
| Treatment (Stress) | F (1, 53) = 2.552 | 0.1161 | ns |
| Paternal Category | F (2, 53) = 0.9028 | 0.4116 | ns |
| Bonferronis multiple comparison Test | CC vs CS | t=0.6916 df=53.00 | >0.9999 | ns |
| RC vs RS | t=0.9274 df=53.00 | >0.9999 | ns |
| SC vs SS | t=1.148 df=53.00 | 0.7683 | ns |
| CC vs RC | t=0.7449 df=53.00 | 0.708 | ns |
| CC vs SC | t=0.1920 df=53.00 | 0.977 | ns |
| CS vs RS | t=0.3596 df=53.00 | 0.9219 | ns |
| CS vs SS | t=0.7308 df=53.00 | 0.7171 | ns |
| **Social Interaction Test** | baseline and stressed | SI ratio | 2 way ANOVA | Interaction | F (2, 54) = 0.7460 | 0.4791 | ns | CC=9; CS=12 RC=10; RS=7 SC=10; SS=12 | data normally distributed; 1 outlier CC | **Figure 2b** |
| Treatment (Stress) | F (1, 54) = 0.3662 | 0.5476 | ns |
| Paternal Category | F (2, 54) = 2.130 | 0.1287 | ns |
| Bonferronis multiple comparison Test | CC vs. CR | t=1.180 df=54.00 | 0.4273 | ns |
| CC vs CS | t=0.7508 df=54.00 | 0.7041 | ns |
| SC vs SR | t=0.5453 df=54.00 | 0.8301 | ns |
| SC vs SS | t=1.517 df=54.00 | 0.2521 | ns |
| CC vs SC | t=0.4527 df=54.00 | 0.9581 | ns |
| CR vs SR | t=1.221 df=54.00 | 0.5387 | ns |
| CS vs SS | t=0.1741 df=54.00 | 0.9974 | ns |

PS=paternal stress; OS=offspring stress; CC=control lineage/control; CS=control lineage/stress; RC=resilient lineage/control; RS=resilient lineage/stress; SC=Suscpetible lineage/control; SS=Suscpetible lineage/stress
* = p ≤ 0.05; ** = p ≤ 0.01; *** =p ≤ 0.001 **** =p ≤ 0.0001; # = p ≤ 0.1; ns=not significant
Environment=Home vs Novel
Data Normally distributed=Kolmogorov-Smirnov : p>0.05
RM-ANOVA=Repeated Measures ANOVA

**Extended Data Figure 1-2. Statistical Results**

| **Artificial Insemination: F1 Male** | | | | | | | | | | |
| --- | --- | --- | --- | --- | --- | --- | --- | --- | --- | --- |
| **Experiment** | **Condition** | **Measurement** | **Statistical Test** | **Comparison** | **F (DFn, DFd)** | **P value** | ***** | **Group Size** | **Notes** | **Fig.** |
| **Novelty Suppressed Feeding** | baseline and Stress | ratio latency to eat | 2 way ANOVA | Interaction | F (2, 48) = 0.2080 | 0.813 | ns | CC=7; CS=8 RC=8; RS=9 SC=10; SS=10 | data normally distributed, transformed (log); 2 outliers: 1 SC, 1 CC | **Figure 1d** |
| Treatment (Stress) | F (1, 48) = 4.072 | 0.0492 | * |
| Paternal Cat | F (2, 48) = 0.4511 | 0.6396 | ns |
| Bonferronis multiple comparison Test | CC vs CR | t=0.6115 df=48.00 | >0.9999 | ns |
| CC vs CS | t=0.3522 df=48.00 | >0.9999 | ns |
| SC vs SR | t=0.1715 df=48.00 | >0.9999 | ns |
| SC vs SS | t=0.4456 df=48.00 | >0.9999 | ns |
| CC vs SC | t=0.8158 df=48.00 | >0.9999 | ns |
| CR vs SR | t=1.664 df=48.00 | 0.308 | ns |
| CS vs SS | t=1.020 df=48.00 | 0.9388 | ns |
| **Open Field** | baseline and stress | % time middle | 2 way ANOVA | Interaction | F (2, 48) = 0.7281 | 0.4881 | ns | CC=8; CS=8 RC=8; RS=9 SC=11; SS=10 | data normally distributed; 1 outliers: 1 CC | **Figure 1e** |
| Treatment (Stress) | F (1, 48) = 1.467 | 0.2317 | ns |
| Paternal Cat | F (2, 48) = 0.3836 | 0.6835 | ns |
| Bonferronis multiple comparison Test | CC vs CS | t=0.2806 df=48.00 | >0.9999 | ns |
| RC vs RS | t=1.363 df=48.00 | 0.5374 | ns |
| SC vs SS | t=1.086 df=48.00 | 0.8489 | ns |
| CC vs RC | t=1.263 df=48.00 | 0.4256 | ns |
| CC vs SC | t=1.263 df=48.00 | 0.4257 | ns |
| CS vs RS | t=0.3529 df=48.00 | >0.9999 | ns |
| CS vs SS | t=0.05915 df=48.00 | >0.9999 | ns |
| baseline and stress | total distance | 2 way ANOVA | Interaction | F (2, 50) = 0.4780 | 0.6228 | ns | CC=8; CS=8 RC=8; RS=9 SC=11; SS=10 | data normally distributed; no outliers | **data not shown, instead reporting mean(SEM)** baseline=C: 3789.39(441.97), R: 4659.54(466.47), S: 4003.54(400.48); stress= C: 4108.08(440.21), R: 4479.92(463.46) S: 4724.71(552.27) |
| Treatment (Stress) | F (1, 50) = 0.5578 | 0.4586 | ns |
| Paternal Cat | F (2, 50) = 0.8431 | 0.4364 | ns |
| Bonferronis multiple comparison Test | CC vs CS | t=0.4610 df=50.00 | >0.9999 | ns |
| RC vs RS | t=0.2598 df=50.00 | >0.9999 | ns |
| SC vs SS | t=1.184 df=50.00 | 0.7261 | ns |
| CC vs RC | t=1.259 df=50.00 | 0.4279 | ns |
| CC vs SC | t=0.3414 df=50.00 | >0.9999 | ns |
| CS vs RS | t=0.5379 df=50.00 | >0.9999 | ns |
| CS vs SS | t=0.9138 df=50.00 | 0.7304 | ns |
| **Social Interaction Test (SCVS stressor)** | baseline and stressed | SI ratio | 2-way ANOVA | Interaction | F (2, 51) = 0.03133 | 0.9692 | ns | CC=12; CS=11 RC=7; RS=9 SC=11; SS=7 | data normally distributed; 2 SS outliers | **data not shown, instead reporting mean(SEM)** baseline=C: 1.01(0.19), R: 0.92(0.30), S: 1.23(0.19); stress= C: 1.18(0.24), R: 1.07(0.20) S: 1.30(0.26) |
| Treatment (Stress) | F (1, 51) = 0.4785 | 0.4922 | ns |
| Paternal Category | F (2, 51) = 0.6417 | 0.5306 | ns |
| Bonferronis multiple comparison Test | CC vs CR | t=0.2719 df=51.00 | 0.9545 | ns |
| CC vs CS | t=0.7297 df=51.00 | 0.718 | ns |
| SC vs SR | t=0.3550 df=51.00 | 0.9239 | ns |
| SC vs SS | t=0.3432 df=51.00 | 0.9286 | ns |
| CC vs SC | t=0.5770 df=51.00 | 0.9185 | ns |
| CR vs SR | t=0.4326 df=51.00 | 0.9631 | ns |
| CS vs SS | t=0.2031 df=51.00 | 0.9959 | ns |
| **Social Interaction Test (CSDS stressor)** | pre defeat vs post defeat | SI ratio | 2-way ANOVA | Interaction | F (1, 19) = 7.328 | 0.014 | * | CC=4; CS=4 RC=3; RS=4 SC=5; SS=5 | data normally distributed; 1 RC outlier | **Figure 1g** |
| Treatment (Stress) | F (2, 19) = 2.183 | 0.1401 | ns |
| Paternal Category | F (2, 19) = 2.492 | 0.1094 | ns |
| Bonferronis multiple comparison Test | CC vs CR | t=1.519 df=19 | 0.2693 | ns |
| CC vs CS | t=1.435 df=19 | 0.3071 | ns |
| SC vs SR | t=0.3971 df=19 | 0.9074 | ns |
| SC vs SS | t=0.2908 df=19 | 0.9491 | ns |
| CC vs SC | t=1.237 df=19 | 0.5458 | ns |
| CR vs SR | t=3.032 df=19 | 0.0204 | * |
| CS vs SS | t=0.1693 df=19 | 0.9977 | ns |

Environment=Home vs Novel
Data Normal=Kolmogorov-Smirnov : p>0.05
PS=paternal stress; OS=offspring stress; CC=control lineage/control; CS=control lineage/stress; RC=resilient lineage/control; RS=resilient lineage/stress; SC=Suscpetible lineage/control; SS=Suscpetible lineage/stress

**Extended Data Figure 2-2. Statistical Result**

| **Artificial Insemination: F1 Female** | | | | | | | | | | |
| --- | --- | --- | --- | --- | --- | --- | --- | --- | --- | --- |
| **Experiment** | **Condition** | **Measurement** | **Statistical Test** | **Comparison** | **F (DFn, DFd)** | **P value** | ***** | **Group Size** | **Notes** | **Fig.** |
| **Novelty Suppressed Feeding** | baseline and stressed | NSF ratio | 2-way ANOVA | Interaction | F (2, 54) = 0.1807 | 0.8352 | ns | CC=11; CS=8; RC=10; RS=6 SC=10; SS=10 | data normally distributed, transformed (log); no outliers | **data not shown, instead reporting mean(SEM);** baseline=C: 2.79(0.47), R: 3.77(0.96), S: 2.96(0.51); stress= C: 5.58(1.08), R: 4.90(2.33) S: 4.99(1.01) |
| Treatment (Stress) | F (1, 54) = 3.643 | 0.0616 | # |
| Paternal Category | F (2, 54) = 0.04218 | 0.9587 | ns |
| Bonferronis multiple comparison Test | CC vs CR | t=0.04360 df=54.00 | >0.9999 | ns |
| CC vs CS | t=0.1831 df=54.00 | >0.9999 | ns |
| SC vs SR | t=0.02946 df=54.00 | >0.9999 | ns |
| SC vs SS | t=0.5235 df=54.00 | >0.9999 | ns |
| CC vs SC | t=1.323 df=54.00 | 0.5743 | ns |
| CR vs SR | t=1.324 df=54.00 | 0.5735 | ns |
| CS vs SS | t=0.6388 df=54.00 | >0.9999 | ns |
| **Open Field** | baseline and stressed | % time middle | 2-way ANOVA | Interaction | F (2, 53) = 0.7078 | 0.4973 | ns | CC=11; CS=10 RC=10; RS=9 SC=11; SS=9 | data normally distributed, transformed (sqrt); 1 outlier SS | **Figure 2c** |
| Treatment (Stress) | F (1, 53) = 3.748 | 0.1008 | ns |
| Paternal Category | F (2, 53) = 0.2920 | 0.748 | ns |
| Bonferronis multiple comparison Test | CC vs CS | t=0.4778 df=53.00 | >0.9999 | ns |
| RC vs RS | t=0.8092 df=53.00 | >0.9999 | ns |
| SC vs SS | t=2.067 df=53.00 | 0.0582 | # |
| CC vs RC | t=0.3042 df=53.00 | 0.9434 | ns |
| CC vs SC | t=0.8287 df=53.00 | 0.6531 | ns |
| CS vs RS | t=0.6493 df=53.00 | 0.7686 | ns |
| CS vs SS | t=0.7989 df=53.00 | 0.6727 | ns |
| baseline and stressed | total distance | 2-way ANOVA | Interaction | F (2, 54) = 0.3088 | 0.7356 | ns | CC=11; CS=10 RC=10; RS=8 SC=11; SS=10 | data normally distributed; no outliers | **data not shown, instead reporting mean(SEM)** baseline=C: 3661.63(472.84), R: 3828.09(468.64), S: 3569.98(329.66); stress= C: 4381.31(340.41), R: 5159.96(434.10) S: 4880.10(576.96) |
| Treatment (Stress) | F (1, 54) = 9.376 | 0.0034 | ** |
| Paternal Category | F (2, 54) = 0.5412 | 0.5851 | ns |
| Bonferronis multiple comparison Test | CC vs CS | t=1.169 df=54.00 | 0.7429 | ns |
| RC vs RS | t=1.992 df=54.00 | 0.1542 | ns |
| SC vs SS | t=2.128 df=54.00 | 0.1139 | ns |
| CC vs RC | t=0.2703 df=54.00 | 0.955 | ns |
| CC vs SC | t=0.1525 df=54.00 | 0.9854 | ns |
| CS vs RS | t=1.165 df=54.00 | 0.4364 | ns |
| CS vs SS | t=0.7914 df=54.00 | 0.6776 | ns |
| **Social Interaction Test** | baseline and stressed | SI ratio | 2-way ANOVA | Interaction | F (2, 49) = 3.701 | 0.0318 | * | CC=12; CS=10 RC=8; RS=9 SC=6; SS=10 | data normally distributed; no outliers | **Figure 2b** |
| Treatment (Stress) | F (1, 49) = 6.168 | 0.0165 | * |
| Paternal Category | F (2, 49) = 4.112 | 0.0223 | * |
| Bonferronis multiple comparison Test | CC vs CS | t=0.6468 df=49.00 | >0.9999 | ns |
| RC vs RS | t=1.738 df=49.00 | 0.2655 | ns |
| SC vs SS | t=2.885 df=49.00 | 0.0174 | * |
| CC vs RC | t=0.9591 df=49.00 | 0.6844 | ns |
| CC vs SC | t=3.388 df=49.00 | 0.0028 | ** |
| CS vs RS | t=1.488 df=49.00 | 0.2864 | ns |
| CS vs SS | t=0.1623 df=49.00 | >0.9999 | ns |

PS=paternal stress; OS=offspring stress; CC=control lineage/control; CS=control lineage/stress; RC=resilient lineage/control; RS=resilient lineage/stress; SC=Suscpetible lineage/control; SS=Suscpetible lineage/stress
* = p ≤ 0.05; ** = p ≤ 0.01; *** =p ≤ 0.001 **** =p ≤ 0.0001; # = p ≤ 0.1; ns=not significant
Environment=Home vs Novel
Data Normally distributed=Kolmogorov-Smirnov : p>0.05
RM-ANOVA=Repeated Measures ANOVA

**Extended Data Figure 5-1. RNA Seq Biotype Diversity Statistical Results**

| **Statistical Test** | **Comparison** | **Chi Squared, df** | **P value** | ***** | **Sample Size** | **Fig.** |
| --- | --- | --- | --- | --- | --- | --- |
| Chi squared | Pre R vs Pre S Gene Type | χ2=11.89, df=2 | 0.0026 | ** | C: 6 R: 7 S: 7 | Figure 5a,b |
| Post R vs Post S Gene Type | χ2=8.213, df=2 | 0.0165 | * |
| Pre R vs Post R Gene Type | χ2=2.494, df=2 | 0.2874 | ns |
| Pre S vs Post S Gene Type | χ2=48.97, df=2 | <0.0001 | **** |
| lncRNA effect | χ2=37.61, df=1 | <0.0001 | **** |

* = p ≤ 0.05; ** = p ≤ 0.01; *** =p ≤ 0.001 **** =p ≤ 0.0001; # = p ≤ 0.1; ns=not significant
